# Supplementary material for: A gold immunochromatographic assay for the rapid and simultaneous detection of fifteen β-lactams
Source: Royal Society of Chemistry journal article supplement (doi:10.1039/c5nr04987c), 2015-01-01
Supplement: c5nr04987c1.pdf [file c5nr04987c1.pdf]

### Supporting information

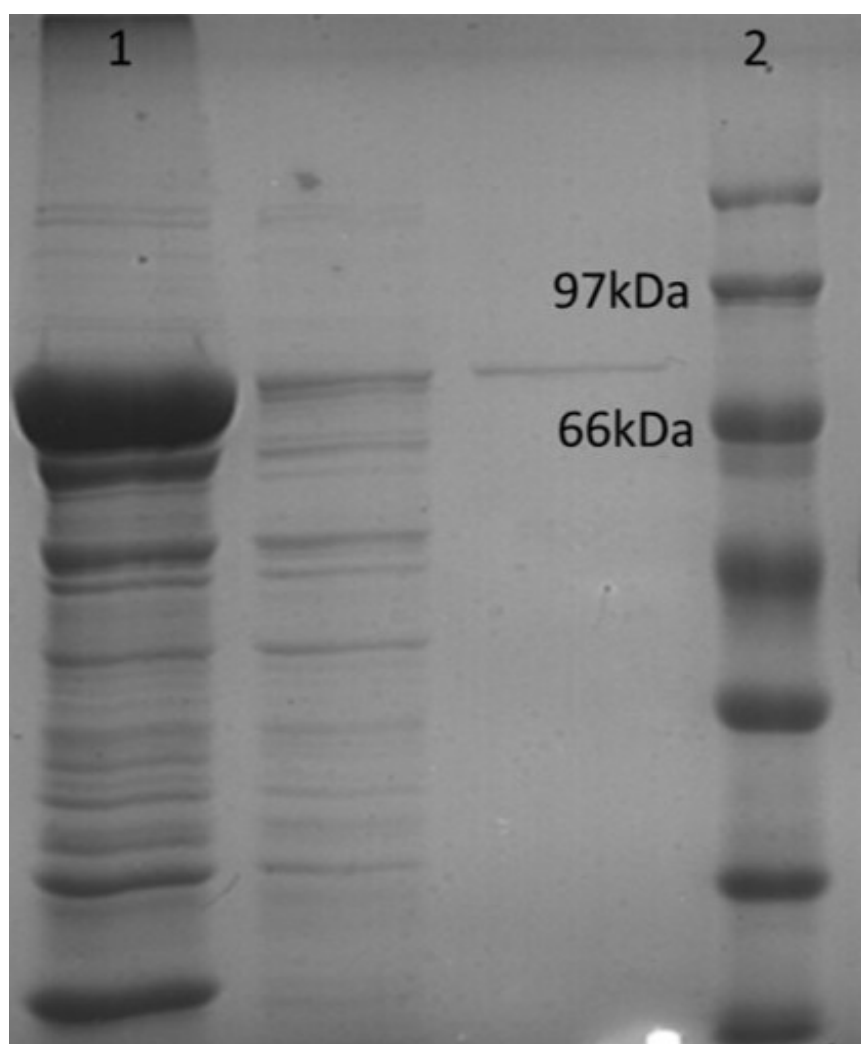

**Fig. S1** The electrophoretogram of receptors against  $\beta$ -lactams

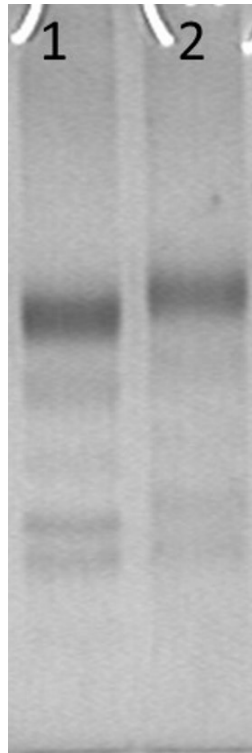

**Fig. S2** The electrophoretogram of BSA (0.3 mg/mL) and AMP-BSA (0.3 mg/mL).

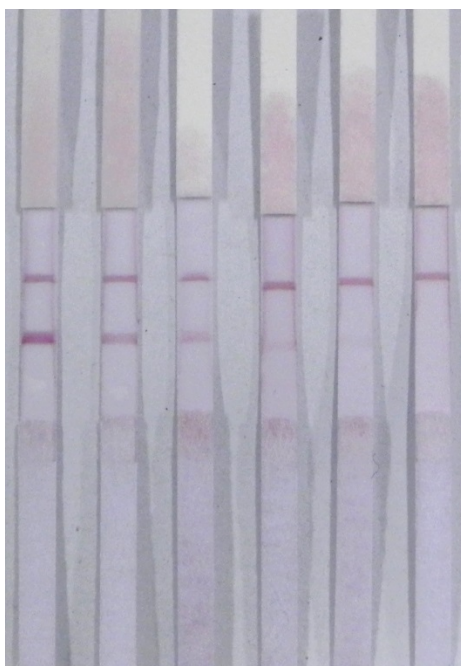

**Fig. S3** Images of cloxacillin analysis in milk samples using the GICA based on receptors. The concentrations of cloxacillin in the 10 times diluted milk were 0, 1, 2, 5, 10, and 25 ng/mL, respectively.

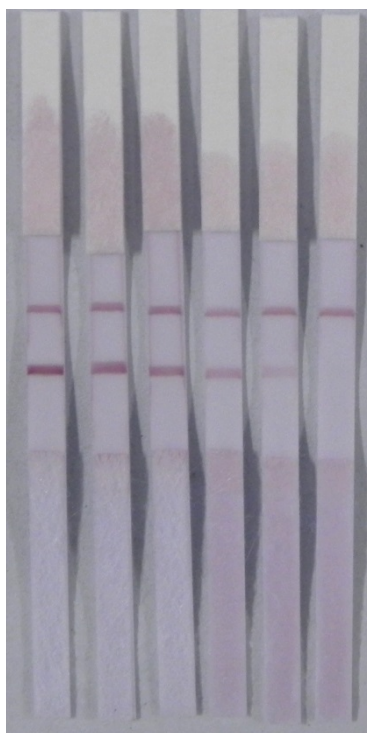

**Fig. S4** Images of dicloxacillin analysis in milk samples using the GICA based on receptors. The concentrations of dicloxacillin in the 10 times diluted milk were 0, 1, 2, 5, 10, and 20 ng/mL, respectively.

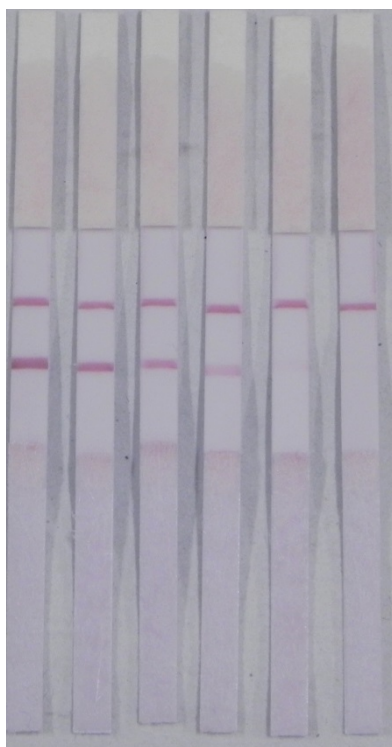

**Fig. S5** Images of nafcillin analysis in milk samples using the GICA based on receptors. The concentration of nafcillin in the 10 times diluted milk were 0, 2, 5, 10, 25, and 50 ng/mL, respectively.

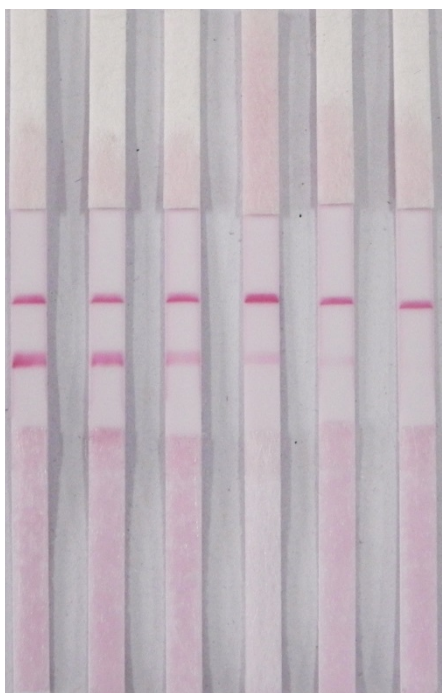

**Fig. S6** Images of oxacillin analysis in milk samples using the GICA based on receptors. The concentrations of oxacillin in the 10 times diluted milk were 0, 4, 10, 20, 50, and 100 ng/mL, respectively.

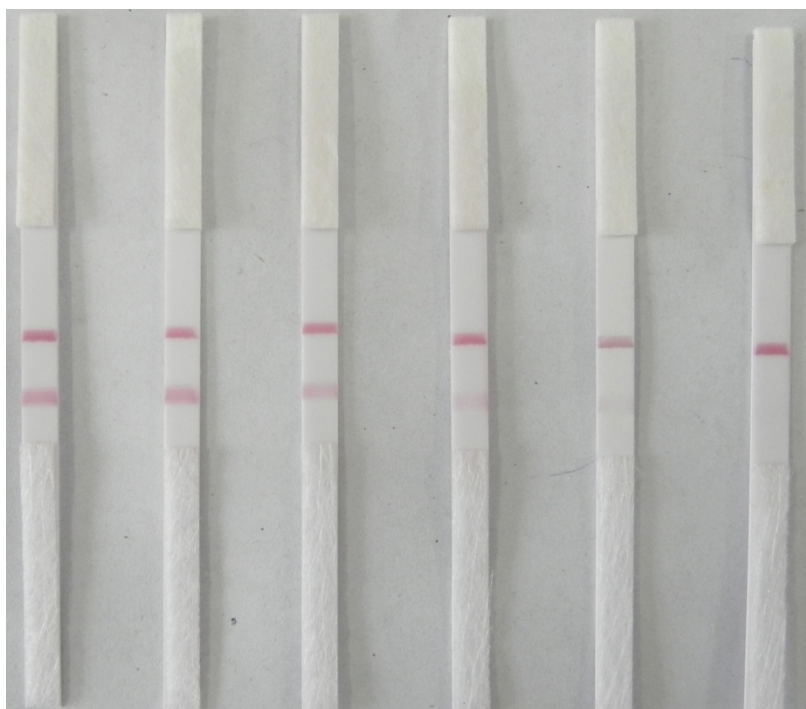

**Fig. S7** Images of cefotaxime analysis in milk samples using the GICA based receptors. The concentrations of cefotaxime in the 10 times diluted milk were 0, 50, 100, 250, 500, and 1000 ng/mL, respectively.

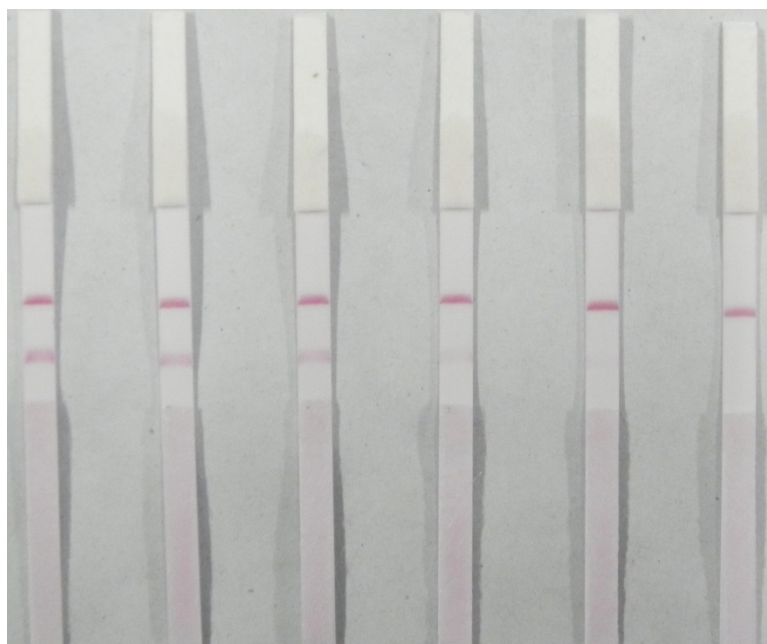

**Fig. S8** Images of ceftiofur analysis in milk samples using the GICA based receptors. The concentrations of ceftiofur in the 10 times diluted milk were 0, 10, 25, 50, 100, and 200 ng/mL, respectively.



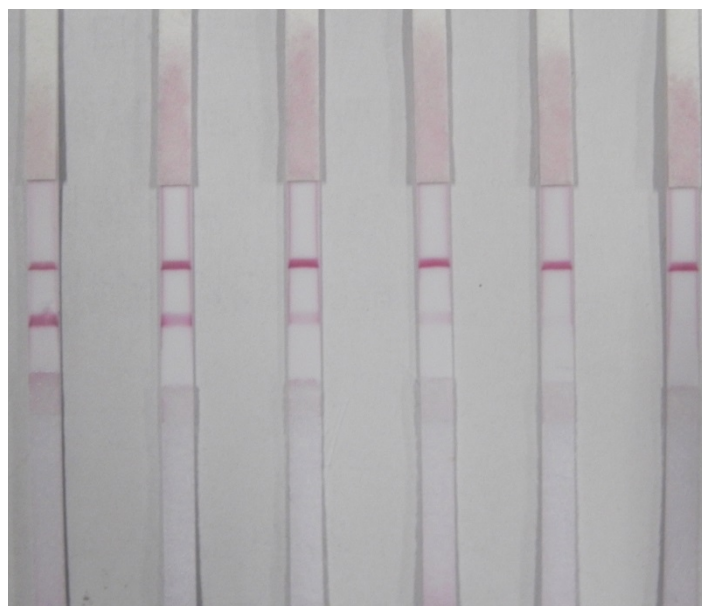

**Fig. S9** Images of cefepime analysis in milk samples using the GICA based on receptors. The concentrations of cefepime in the 10 times diluted milk were 0, 2, 5, 10, 25, and 50 ng/mL, respectively.
